# Supplementary material
Source: Elsevier journal article supplement (https://www.sciencedirect.com/science/article/pii/S1665268121002660)
Supplement: mmc1 [file S1665268121002660:mmc1.docx]

**Table**

**Supplementary Table 1 Primer sequence for qRT-PCR**

| **Gene** | **sense sequence** **(5’-3’)** | **anti-sense sequence (5’-3’)** |
| --- | --- | --- |
| miR-221-3p | CGGCTACATTGTCTGCCTG | CAGTGCGTGTCGTGGAGT |
| LIFR | TGGAACGACAGGGGTTCAGT | GAGTTGTGTTGTGGGTCACTAA |
| U6 | CGCTTCGGCAGCACATATAC | AACGCTTCACGAATTTGCGT |
| GAPDH | TGTGGGCATCAATGGATTTGG | ACACCATGTATTCCGGGTCAAT |

**Supplementary Table 2 Antibodies for Western blot**

| Antibody | WB | Specificity | Company |
| --- | --- | --- | --- |
| β-actin | 1:5000 | Rabbit polyclonal | Abcam, China |
| LIFR | 1 µg/ml | Rabbit polyclonal | Abcam, China |
| IgG | 1:5000 | Goat anti Rabbit | Abcam, China |
